# Supplementary material for: A Universal LC-MS/MS Method for Simultaneous Detection of Antibiotic Residues in Animal and Environmental Samples
Source: MDPI journal article supplement (doi:10.3390/antibiotics11070845), 2022-06-24
Supplement: s1 [file s1]

**Table S1.** Reduction in sensitivity of overall protocol for 43 antibiotics at spike-in concentrations of 10 µg, 5 µg, and 1 µg.

| Groups           | Antibiotics                              | Water Sample       |                   |                   | Fecal Sample       |                   |                   | Meat Sample        |                   |                   |
|------------------|------------------------------------------|--------------------|-------------------|-------------------|--------------------|-------------------|-------------------|--------------------|-------------------|-------------------|
|                  |                                          | 10 µg<br>spiked in | 5 µg<br>spiked in | 1 µg<br>spiked in | 10 µg<br>spiked in | 5 µg<br>spiked in | 1 µg<br>spiked in | 10 µg<br>spiked in | 5 µg<br>spiked in | 1 µg<br>spiked in |
| Aminoglycosides  | Gentamicin                               | 0                  | 0                 | 0                 | 0                  | 0                 | 0                 | 0                  | 0                 | 0                 |
|                  | Kanamycin sulfate                        | 0                  | 0                 | 0                 | 0                  | 0                 | 0                 | 0                  | 0                 | 0                 |
|                  | Neomycin trisulfate salt hydrate         | 0                  | 0                 | 0                 | 0                  | 0                 | 0                 | 0                  | 0                 | 0                 |
|                  | Spectinomycin hydrochloride pentahydrate | 100                | 66.7              | 0                 | 66.7               | 66.7              | 0                 | 100                | 100               | 0                 |
|                  | Streptomycin sulfate salt                | 66.7               | 33.3              | 0                 | 100                | 0                 | 0                 | 100                | 66.7              | 0                 |
| Amphenicols      | Chloramphenicol                          | 100                | 100               | 0                 | 100                | 100               | 0                 | 100                | 100               | 66.7              |
|                  | Florfenicol                              | 100                | 100               | 100               | 100                | 100               | 100               | 100                | 100               | 100               |
| Antifolate       | Trimethoprim                             | 100                | 100               | 100               | 100                | 100               | 100               | 100                | 100               | 100               |
| Carbapenems      | Meropenem                                | 0                  | 0                 | 0                 | 0                  | 0                 | 0                 | 0                  | 0                 | 0                 |
| Cephalosporins   | Cefalexin                                | 100                | 100               | 100               | 100                | 100               | 100               | 100                | 100               | 100               |
|                  | Cefquinome sulfate                       | 0                  | 0                 | 0                 | 0                  | 0                 | 0                 | 0                  | 0                 | 0                 |
|                  | Ceftazidime                              | 0                  | 0                 | 0                 | 0                  | 0                 | 0                 | 0                  | 0                 | 0                 |
|                  | Ceftiofur sodium                         | 100                | 100               | 66.7              | 100                | 100               | 66.7              | 100                | 100               | 0                 |
|                  | Cefuroxime                               | 0                  | 0                 | 0                 | 0                  | 0                 | 0                 | 0                  | 0                 | 0                 |
| Fluoroquinolones | Ciprofloxacin                            | 0                  | 0                 | 0                 | 0                  | 0                 | 0                 | 0                  | 0                 | 0                 |
|                  | Enrofloxacin                             | 100                | 100               | 100               | 100                | 100               | 100               | 100                | 100               | 100               |
|                  | Levofloxacin                             | 100                | 100               | 100               | 100                | 100               | 100               | 100                | 100               | 100               |
|                  | Norfloxacin                              | 0                  | 0                 | 0                 | 0                  | 0                 | 0                 | 0                  | 0                 | 0                 |
|                  | Ofloxacin                                | 100                | 100               | 100               | 100                | 100               | 100               | 100                | 100               | 100               |
| Glycopeptides    | Vancomycin                               | 0                  | 0                 | 0                 | 0                  | 0                 | 0                 | 0                  | 0                 | 0                 |
| Lincosamides     | Clindamycin phosphate                    | 100                | 100               | 100               | 100                | 100               | 100               | 100                | 100               | 100               |
|                  | Lincomycin hydrochloride                 | 100                | 100               | 100               | 100                | 100               | 100               | 100                | 100               | 100               |
| Macrolides       | Erythromycin                             | 100                | 100               | 33.3              | 100                | 33.3              | 0                 | 100                | 100               | 33.3              |
|                  | Tilmicosin                               | 66.7               | 66.7              | 0                 | 100                | 100               | 33.3              | 100                | 100               | 33.3              |
|                  | Tylosin tartrate salt                    | 100                | 100               | 100               | 100                | 100               | 100               | 100                | 100               | 66.7              |
|                  | Tylvalosin                               | 100                | 100               | 33.3              | 100                | 100               | 100               | 100                | 100               | 100               |
| Nitroimidazole   | Metronidazole                            | 100                | 100               | 100               | 100                | 100               | 33.3              | 100                | 100               | 66.7              |

|                                     |                                 |     |     |      |     |      |      |      |     |      |
|-------------------------------------|---------------------------------|-----|-----|------|-----|------|------|------|-----|------|
| Penicillins                         | Amoxicillin                     | 0   | 0   | 0    | 0   | 0    | 0    | 0    | 0   | 0    |
|                                     | Ampicillin                      | 100 | 100 | 66.7 | 100 | 100  | 0    | 100  | 100 | 33.3 |
|                                     | Penicillin G sodium salt        | 100 | 100 | 0    | 100 | 33.3 | 0    | 100  | 100 | 0    |
| Pleuromutilins                      | Tiamulin                        | 100 | 100 | 100  | 100 | 100  | 100  | 100  | 100 | 100  |
| Polymyxins                          | Colistin                        | 0   | 0   | 0    | 0   | 0    | 0    | 0    | 0   | 0    |
| Quinoxaline 1,4-di-N-oxides (QdNOs) | Mequindox                       | 100 | 100 | 100  | 100 | 100  | 100  | 100  | 100 | 100  |
| Sulfonamides                        | Sulfachloropyridazine           | 100 | 100 | 100  | 100 | 100  | 100  | 100  | 100 | 100  |
|                                     | Sulfadiazine                    | 100 | 100 | 100  | 100 | 100  | 100  | 100  | 100 | 100  |
|                                     | Sulfadimidine                   | 100 | 100 | 100  | 100 | 100  | 100  | 100  | 100 | 100  |
|                                     | Sulfamethoxazole                | 100 | 100 | 100  | 100 | 100  | 100  | 100  | 100 | 100  |
|                                     | Sulfamonomethoxine              | 100 | 100 | 100  | 100 | 100  | 100  | 66.7 | 100 | 100  |
| Tetracyclines                       | Chlortetracycline hydrochloride | 100 | 100 | 100  | 100 | 100  | 100  | 100  | 100 | 66.7 |
|                                     | Doxycycline                     | 100 | 100 | 0    | 100 | 100  | 33.3 | 100  | 100 | 0    |
|                                     | Oxytetracycline                 | 100 | 100 | 100  | 100 | 100  | 100  | 100  | 100 | 100  |
|                                     | Tetracycline                    | 100 | 100 | 100  | 100 | 100  | 100  | 100  | 100 | 66.7 |

Sensitivity = [number of true positives/(number of true positives + number of false negatives)] × 100%. Pink: an indication of a reduction in sensitivity for antibiotic as compared to previous spike-in concentration for the same sample type.
